# Supplementary material for: Development of Fermented Camel Milk Incorporating Oats and Sukkari Date Palm Fruit: Nutritional, Physicochemical, Functional, and Organoleptic Attributes
Source: MDPI journal article supplement (doi:10.3390/fermentation9100864), 2023-09-23
Supplement: s1 [file s1]

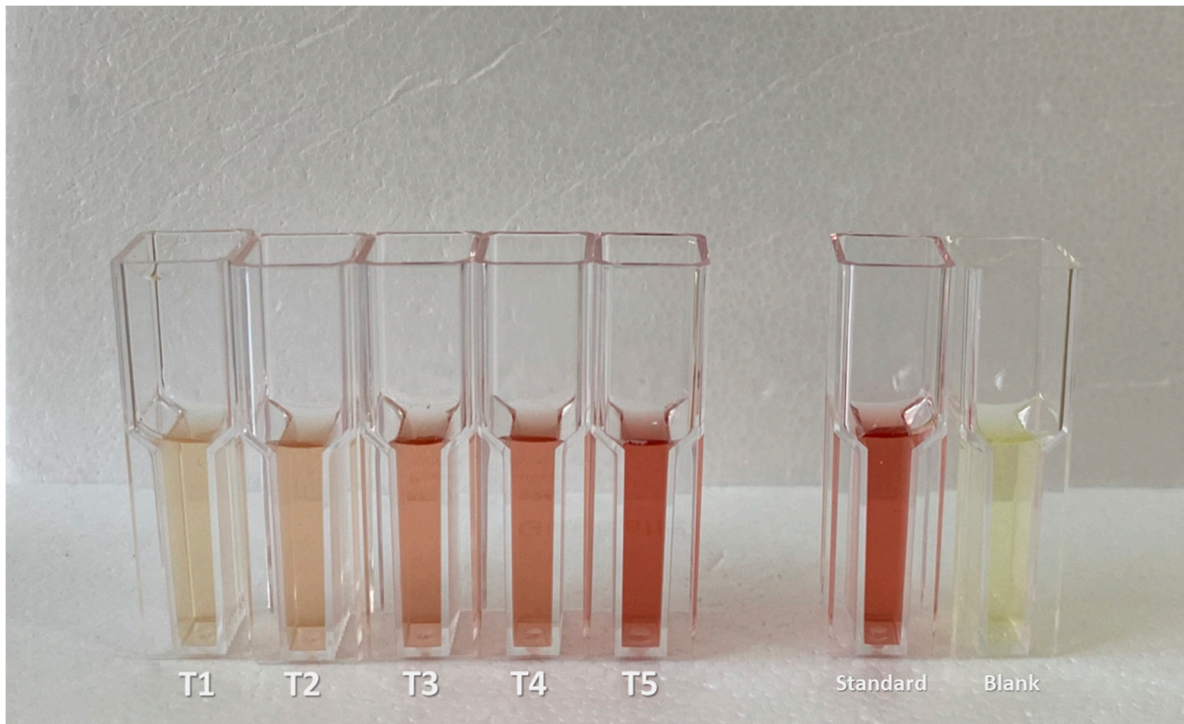

Figure S1: Changes in generated color after the  $\beta$ -glucan assay compared to standard and blank; red colors indicate the presence of  $\beta$ -glucan
