# Supplementary material for: Development of Fermented Camel Milk Incorporating Oats and Sukkari Date Palm Fruit: Nutritional, Physicochemical, Functional, and Organoleptic Attributes
Source: MDPI journal article supplement (doi:10.3390/fermentation9100864), 2023-09-23
Supplement: s1 [file s1]

Archive with 1 entries (1 files):
- fermentation-2581472-supplementary.pdf
